# Supplementary material
Source: HighWire-hosted journal article supplement (https://www.jneurosci.org/highwire/filestream/601774/field_highwire_adjunct_files/0/Supplemental_Figure.pdf)

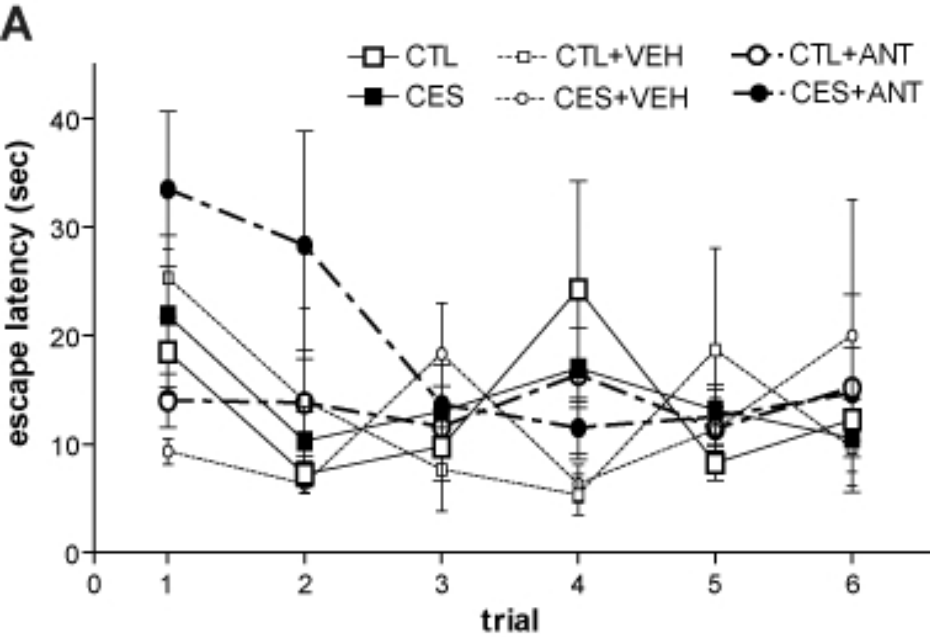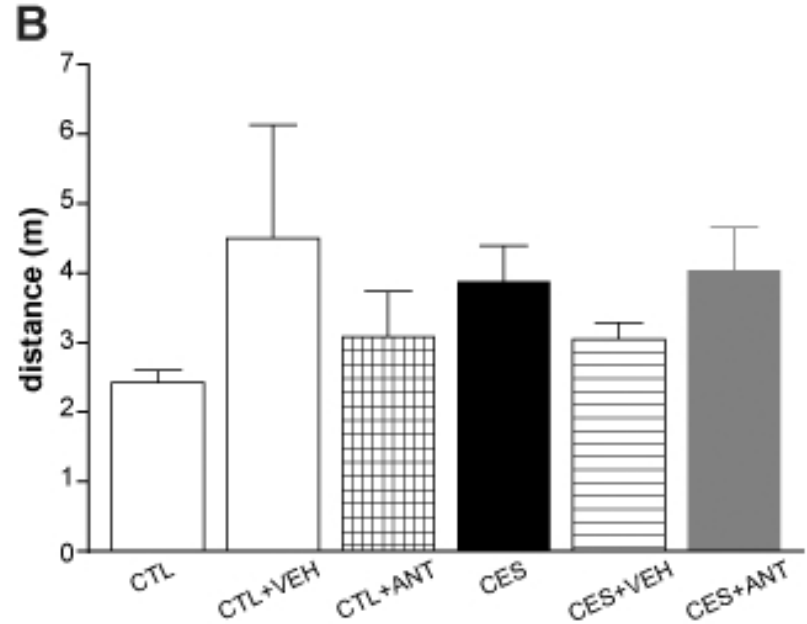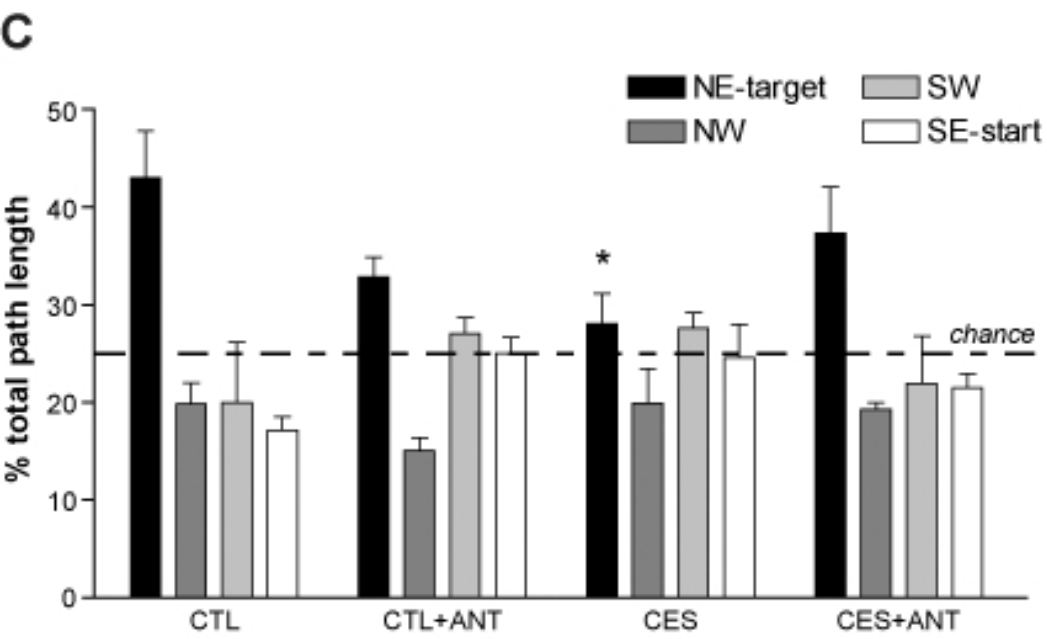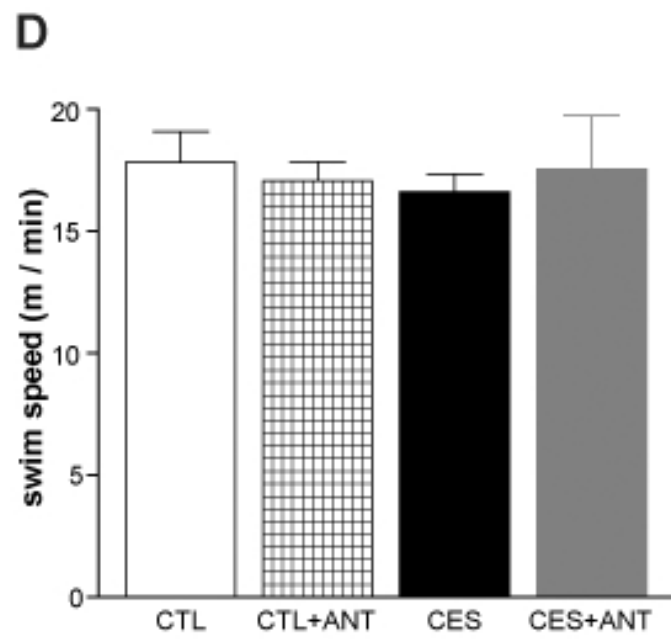

Supplement: Supplemental_Figure.pdf [file Supplemental_Figure.pdf]
